# Supplementary material for: The integrated single-cell analysis developed an immunogenic cell death signature to predict lung adenocarcinoma prognosis and immunotherapy
Source: publisher site journal article supplement (doi:10.18632/aging.205077), 2023-10-04
Supplement: Supplementary file [file aging-v15i19-205077-supplementary-material-SD1.pdf]

## SUPPLEMENTARY FIGURES

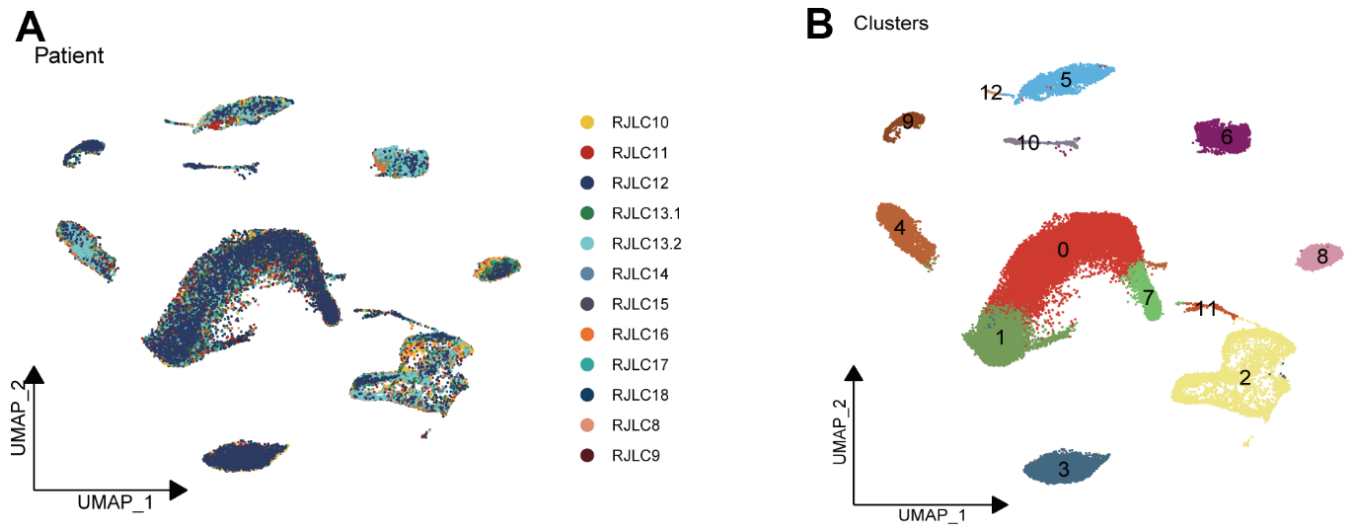

**Supplementary Figure 1. Single-cell dimensionality reduction clustering.** (A) A UMAP plot showing the cell distribution characteristics in 12 samples. (B) A UMAP plot showing all cells were clustered into 13 clusters.

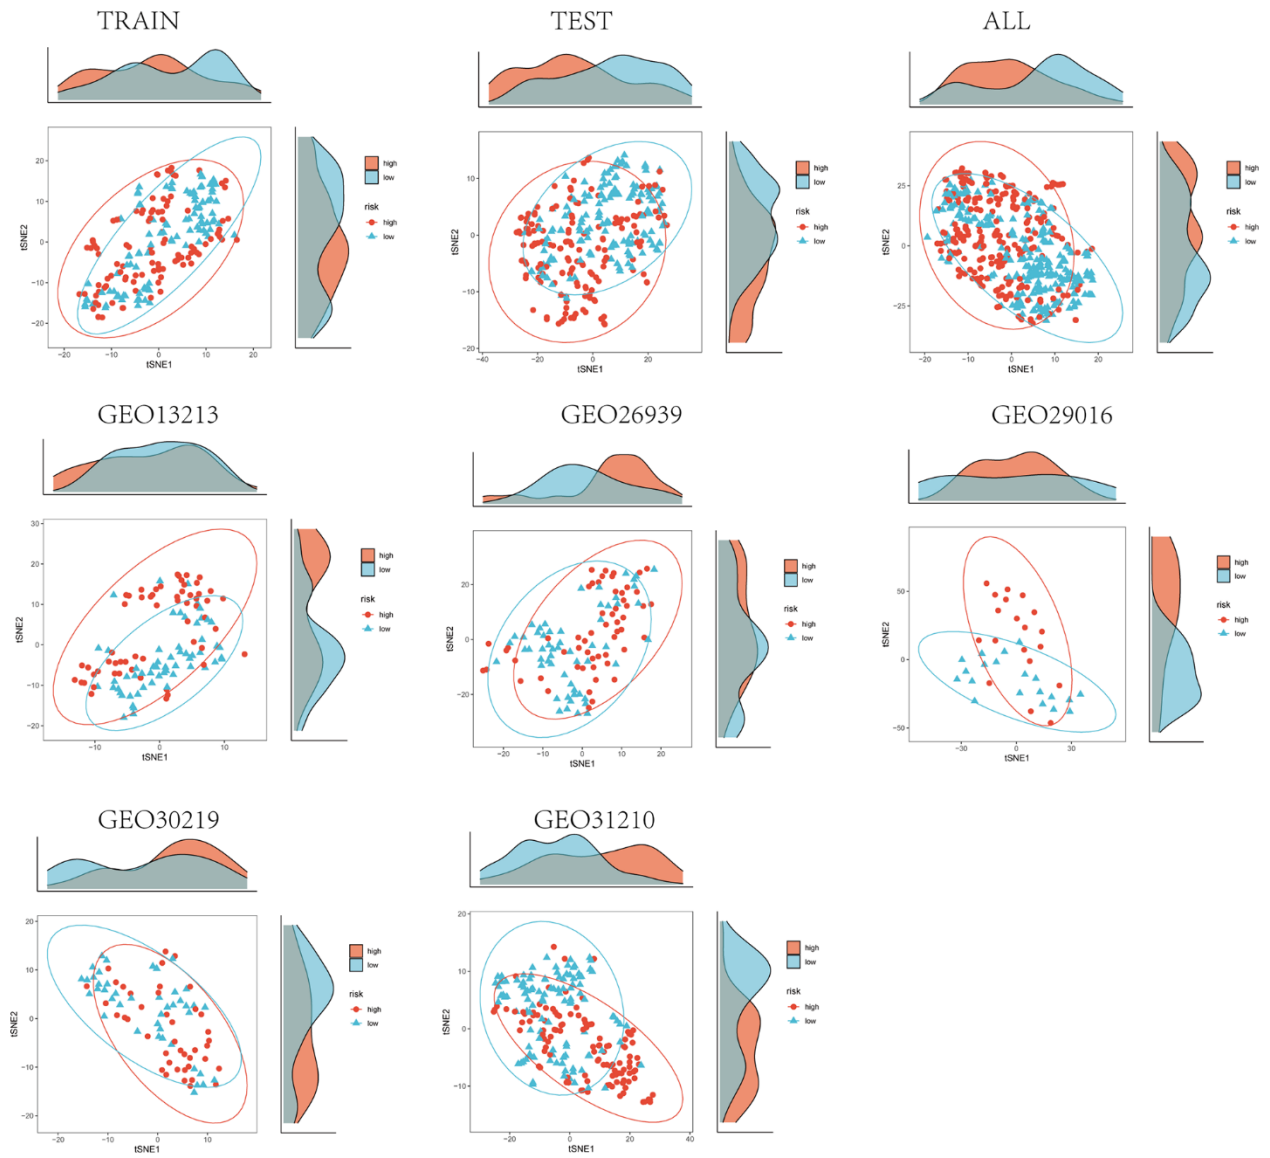

Supplementary Figure 2. t-SNE plot showing the distribution characteristics of samples in bulk RNA-seq.

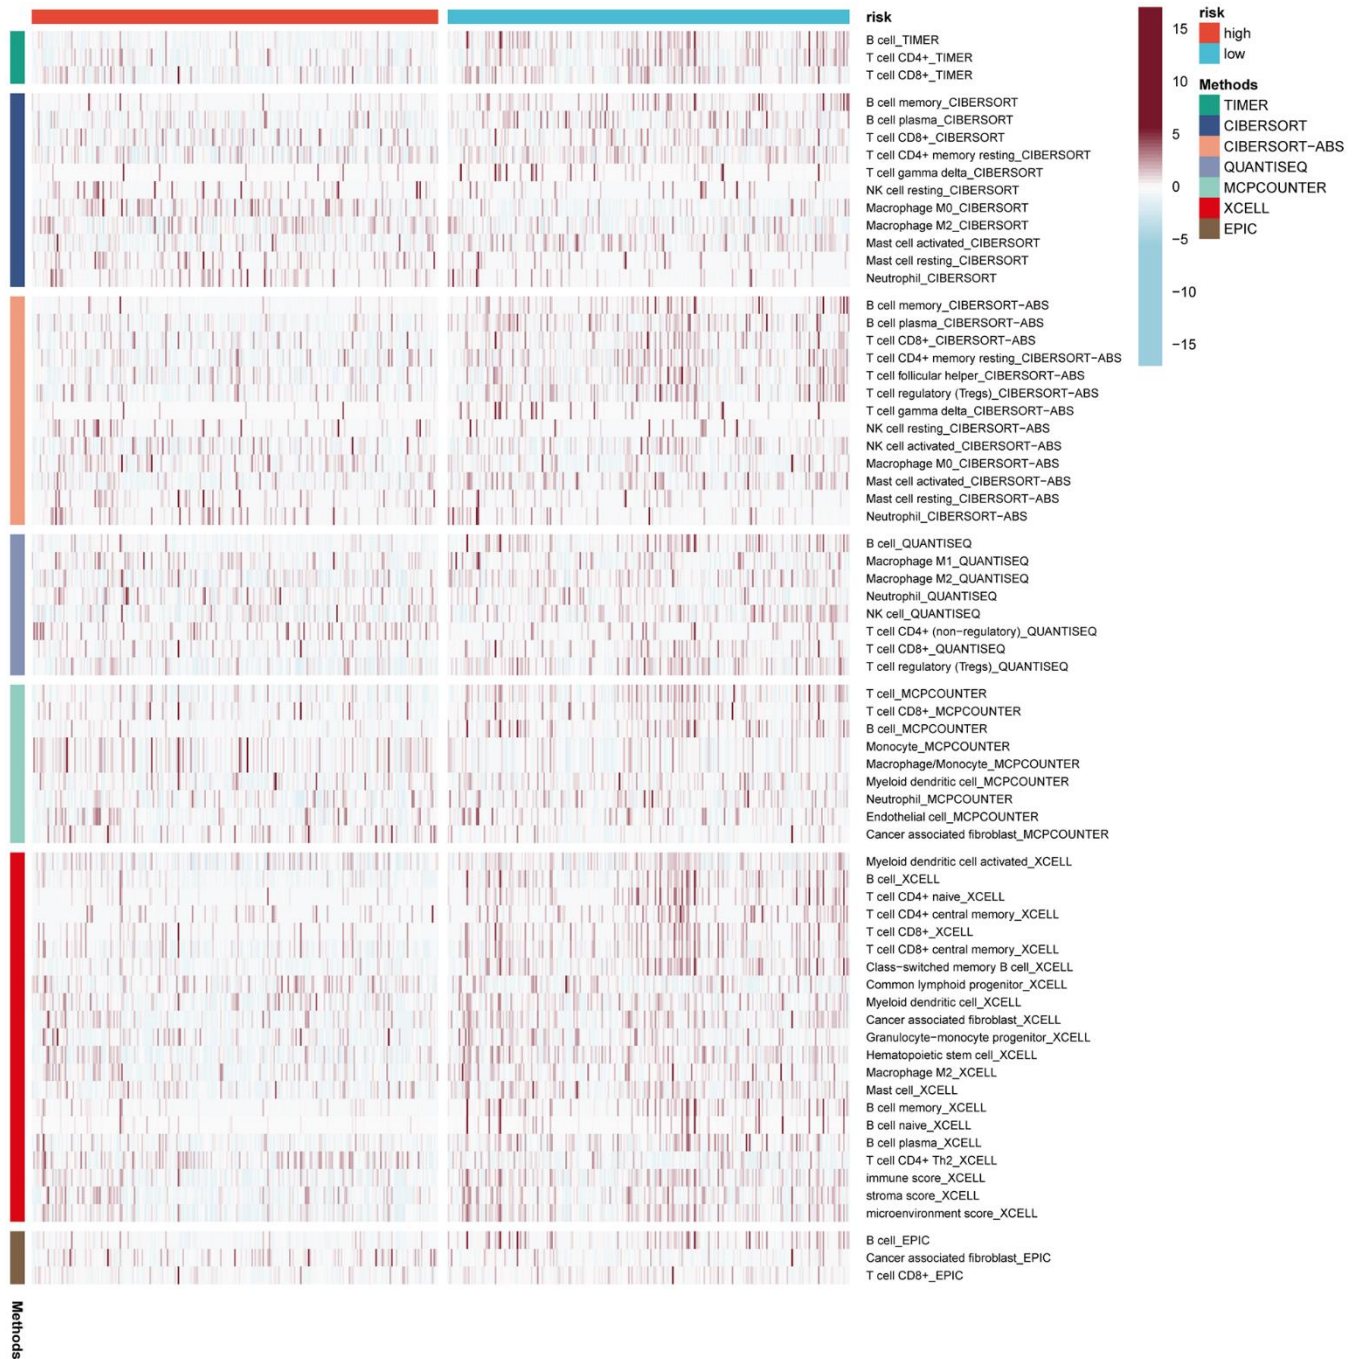

Supplementary Figure 3. Assessing differences in immune cell infiltration in high- and low-risk groups using 7 algorithms.
