# Supplementary material for: The integrated single-cell analysis developed an immunogenic cell death signature to predict lung adenocarcinoma prognosis and immunotherapy
Source: publisher site journal article supplement (doi:10.18632/aging.205077), 2023-10-04
Supplement: Supplementary file [file aging-v15i19-205077-supplementary-material-SD2.pdf]

## SUPPLEMENTARY TABLE

**Supplementary Table 1.  
Genes involved in  
immunogenic cell death.**

---

ATG5  
BAX  
CALR  
CASP1  
CASP8  
CD4  
CD8A  
CD8B  
CXCR3  
EIF2AK3  
ENTPD1  
FOXP3  
HMGB1  
HSP90AA1  
IFNA1  
IFNB1  
IFNG  
IFNGR1  
IL10  
IL17A  
IL17RA  
IL1B  
IL1R1  
IL6  
LY96  
MYD88  
NLRP3  
NT5E  
P2RX7  
PDIA3  
PIK3CA  
PRF1  
TLR4  
TNF

---
